1 **Full Title: An *in vitro* human-based fracture gap model – Mimicking the crosstalk**  
2 **between bone and immune cells**

3  
4 **Authors:** Moritz Pfeiffenberger<sup>1,2</sup>, Alexandra Damerou<sup>1,2</sup>, Igor Ponomarev<sup>3</sup>, Christian H.  
5 Bucher<sup>4,5</sup>, Yuling Chen<sup>1,2</sup>, Dirk Barnewitz<sup>3</sup>, Christa Thöne-Reineke<sup>6</sup>, Paula Hoff<sup>1,7</sup>, Frank  
6 Buttgereit<sup>1,2,4</sup>, Timo Gaber<sup>1,2,4</sup>, Annemarie Lang<sup>1,2,4</sup>

7  
8 **Affiliations**

9 <sup>1</sup>Charité – Universitätsmedizin Berlin, corporate member of Freie Universität Berlin,  
10 Humboldt-Universität zu Berlin, and Berlin Institute of Health, Department of Rheumatology  
11 and Clinical Immunology, Berlin, Germany

12 <sup>2</sup>German Rheumatism Research Centre (DRFZ) Berlin, a Leibniz Institute, Berlin, Germany

13 <sup>3</sup>Research Center of Medical Technology and Biotechnology, Bad Langensalza, Germany

14 <sup>4</sup>Charité – Universitätsmedizin Berlin, corporate member of Freie Universität Berlin, Humboldt-  
15 Universität zu Berlin, and Berlin Institute of Health, Berlin Institute of Health Center for  
16 Regenerative Therapies, Berlin, Germany

17 <sup>5</sup>Charité – Universitätsmedizin Berlin, corporate member of Freie Universität Berlin, Humboldt-  
18 Universität zu Berlin, and Berlin Institute of Health, Julius Wolff Institute, Berlin, Germany

19 <sup>6</sup>Institute of Animal Welfare, Animal Behavior and Laboratory Animal Science, Department of  
20 Veterinary Medicine, Freie Universität Berlin, Berlin, Germany

21 <sup>7</sup>Endokrinologikum Berlin, MVZ am Gendarmenmarkt, Berlin, Germany

22  
23 **Correspondence**

24 Dr. med. vet. Annemarie Lang, PhD

25 Charité – Universitätsmedizin Berlin, corporate member of Freie Universität Berlin, Humboldt-  
26 Universität zu Berlin, and Berlin Institute of Health

27 Department of Rheumatology and Clinical Immunology

28 Charitéplatz 1, 10117 Berlin

29 [annemarie.lang@charite.de](mailto:annemarie.lang@charite.de)

30

31

32 **Abstract**

33 The interaction between the bone and immune cells plays a crucial role in bone pathologies  
34 such as disturbed fracture healing. After a trauma, the initially formed fracture hematoma in  
35 the fracture gap contains all important components (immune/stem cells, mediators) to directly  
36 induce bone regeneration and is therefore of great importance but most susceptible to negative  
37 influences. Thus, reliable *in vitro* models are needed to study the underlying mechanisms and  
38 to predict the efficiency of novel therapeutic approaches. Since common bioengineering  
39 approaches exclude the immune component, we introduce an *in vitro* 3D fracture gap model  
40 which combines scaffold-free bone-like constructs with a fracture hematoma model consisting  
41 of human peripheral blood (immune cells) and bone marrow-derived mesenchymal stromal  
42 cells. Our *in vitro* 3D fracture gap model provides all osteogenic cues to induce the initial bone  
43 healing processes, which were further promoted by applying the osteoinductive deferoxamine  
44 (DFO). Thus, we were able to distinctly mimic processes of the initial fracture phase and  
45 demonstrated the importance of including the crosstalk between bone and immune cells.

46

47

48 **Key words:** bone; fracture; fracture hematoma; immune cells; *in vitro* model

## 49 Introduction

50 Bone is an essential part of the musculoskeletal system shaping the body and enabling  
51 locomotion and stability. Bone pathologies such as osteoporosis or disturbed fracture healing  
52 lead to pain, immobility, inflexibility, considerable loss of life quality and even mental illnesses<sup>1</sup>.  
53 Traumatic events can result in bone fracturing accompanied by vessel ruptures and the  
54 opening of the bone marrow channel. The pivotal event in the initial phase of fracture healing  
55 is the formation of the fracture hematoma, which mainly consists of immune and progenitor  
56 cells<sup>2,3</sup>. Negative influences on the initial phase by medications or comorbidities such as  
57 diabetes, rheumatoid arthritis or immunosuppression can lead to disturbed fracture healing  
58 occurring in approximately 10% of patients with fractures<sup>4,5</sup>. Recent treatment strategies have  
59 achieved high technology standards with regard to fixation systems such as plates or implants,  
60 regenerative approaches using autologous bone graft (gold-standard) or the additional  
61 application of stem cells and/or growth factors<sup>6</sup>. Therefore, preclinical studies are highly  
62 needed to tackle the unmet clinical need, especially with respect to an aging population and  
63 the increase of comorbidities.

64 The surgical removal of the fracture hematoma results in a prolonged healing process,  
65 while transplantation in an ectopic location elevates bone formation<sup>7</sup>. Formation of the fracture  
66 hematoma and the constricted interplay of pro- and anti-inflammatory processes are  
67 considered as the starting point of bone regeneration<sup>8-10</sup>. Since the bone marrow cavity is  
68 opened during the fracture, the bone marrow acts as a resource for chondro- and osteo-  
69 progenitor cells such as mesenchymal stromal cells (MSCs). Therefore, it can be hypothesized  
70 that osteogenic induction within the fracture gap is directly induced and controlled by signals  
71 from bone components in the vicinity of the fracture gap<sup>11,12</sup>. Hence, the crosstalk between  
72 immune cells from peripheral blood (after vessel rupture) and the bone marrow, and osteo-  
73 progenitor cells is essential and needs to be considered in preclinical studies<sup>13</sup>. The today's  
74 gold-standard of preclinical drug, compound screening and risk assessment is the use of  
75 animal models - mainly rodents (mice and rats) - which is in accordance with most national  
76 legal requirements. Nevertheless, trans-species differences may be responsible for the limited  
77 transferability of findings to the human patient<sup>14,15</sup>. Mimicking the *in-patient* situation in  
78 preclinical studies is highly encouraged and evading cross-species differences by novel *in vitro*  
79 approaches is of great interest. During the past decades, conventional *in vitro* cell culture  
80 systems have been revised and improved to provide more physiological and human-relevant  
81 features. This development was mainly driven by the triumph of regenerative medicine relying  
82 on improvements in tissue engineering to produce e.g. huge batches of primary cells, 3D  
83 nature-resembling artificial tissues or biocompatible biomaterials. Furthermore, the rapid  
84 technical evolution allocating sophisticated biomaterials, bioreactors and microfluidic platforms

85 allows the development of innovative human-relevant *in vitro* systems as alternative or  
86 predictive support to animal testing<sup>16</sup>.

87 Current *in vitro* systems focus on mimicking bone development, endochondral  
88 ossification or the bone homeostasis itself by using spheroids, scaffold-based or scaffold-free  
89 model systems. Common cell sources are either primary bone-related cells such as  
90 osteoblasts, osteocytes, osteoclasts or MSCs as progenitor cells<sup>16,17</sup>. To mimic fracture  
91 healing, models mainly focus on later stages of the regeneration processes particularly  
92 endochondral ossification or remodeling. We have previously described the development of a  
93 fracture hematoma model consisting of human whole blood and a certain amount of human  
94 (h)MSCs<sup>18</sup>. However, to study the initiated processes in an interconnected manner and more  
95 adequate experimental setting, the combination of the bone components with the fracture  
96 hematoma (immune component) remains elusive.

97 Within our study, we have developed and characterized scaffold-free bone-like  
98 constructs (SFBCs) based on mesenchymal condensation which exceeded the dimensions of  
99 spheroids. These SFBCs were co-cultivated with *in vitro* fracture hematoma (FH) models to (i)  
100 confirm the capability of the SFBCs to act as an osteogenic inducer, (ii) to mimic the initial  
101 phase of fracture healing with adequate culture conditions and (iii) to use the system as a  
102 platform to test potential therapeutics (DFO - deferoxamine).

## 103 **Results**

### 104 ***SFBCs are characterized by permeating mineralization***

105 MSCs are well-known for their pronounced osteogenic capacity, especially when cultivated *in*  
106 *vitro*<sup>17,19</sup>. However, in a first step, we wanted to know if it is possible to employ mesenchymal  
107 condensation as a macroscale approach with consistent 3D self-organization and permeating  
108 mineralization. Thus, SFBCs were generated by hMSC condensation and treatment with  
109 osteogenic medium until analysis at week 12 (**Fig. 1a**). Macroscopic observation indicated  
110 comparable generation of SFBCs from different hMSC donors with a diameter of approx. 1 cm  
111 and a thickness of 0.5 cm (**Fig. 1b**). To verify the mineralization, *in vitro* computed micro-  
112 tomography ( $\mu$ CT) was performed, showing a consistently high mineralization in the outer area  
113 which was slightly reduced towards the center (**Fig. 1c**). 3D reconstruction yielded the  
114 presence of mineralized tissue as indicated by parameters such as bone volume (BV; mean =  
115  $5.1 \pm 3.7 \text{ mm}^3$ ) and bone surface (BS; mean =  $276.1 \pm 195.4 \text{ mm}^2$ ) (**Fig. 1d**). To quantify the  
116 connectedness of the mineralized areas, we additionally examined the trabecular pattern factor  
117 (TBPf). This parameter was originally invented to evaluate trabecular bone. Although no  
118 osteoclasts were present in the SFBCs, thus the formation of clear trabeculae was not  
119 expected, we use this parameter to distinguish between concave (= connected) and convex (=  
120 isolated) structures. Low or even negative values represent hereby high connected tissue

121 which was found in at least 4 (TBPf < 2) out of 9 SFBCs (**Fig. 1d**). To evaluate the structural  
122 morphology of the SFBCs in further detail, we used scanning electron microscopy (SEM) and  
123 found similar morphology when compared to human native bone (**Fig. 1e, f**). In detail, the top  
124 view shows strong matrix formation and a closed superficial layer with certain, isolated crystal-  
125 like depositions while the cut face revealed a layer-like structure.

126 To get a more detailed overview on the matrix composition, assorted histological and  
127 immunohistochemical stainings were applied. Cells were homogenously distributed within the  
128 SFBCs as indicated by hematoxylin and eosin (H&E) staining while Alizarin Red S and von  
129 Kossa staining confirmed the deposition of calcium and phosphate, respectively throughout  
130 the tissue (**Fig. 2a**). Interestingly, SFBCs which showed a higher amount of negative stained  
131 area, showed a more pronounced layer-like structure while the layers itself were strongly  
132 mineralized at the borders (**Fig. 2a**; lower row). Negative controls were cultivated without  
133 osteogenic medium (**Fig. 2b**). In addition, we observed the expression of *collagen type I* (Col  
134 I) and *alkaline phosphatase* (ALP), which are typical markers for osteogenic processes, while  
135 no Col II, a typical marker of chondrogenesis, was found (**Fig. 2c**).

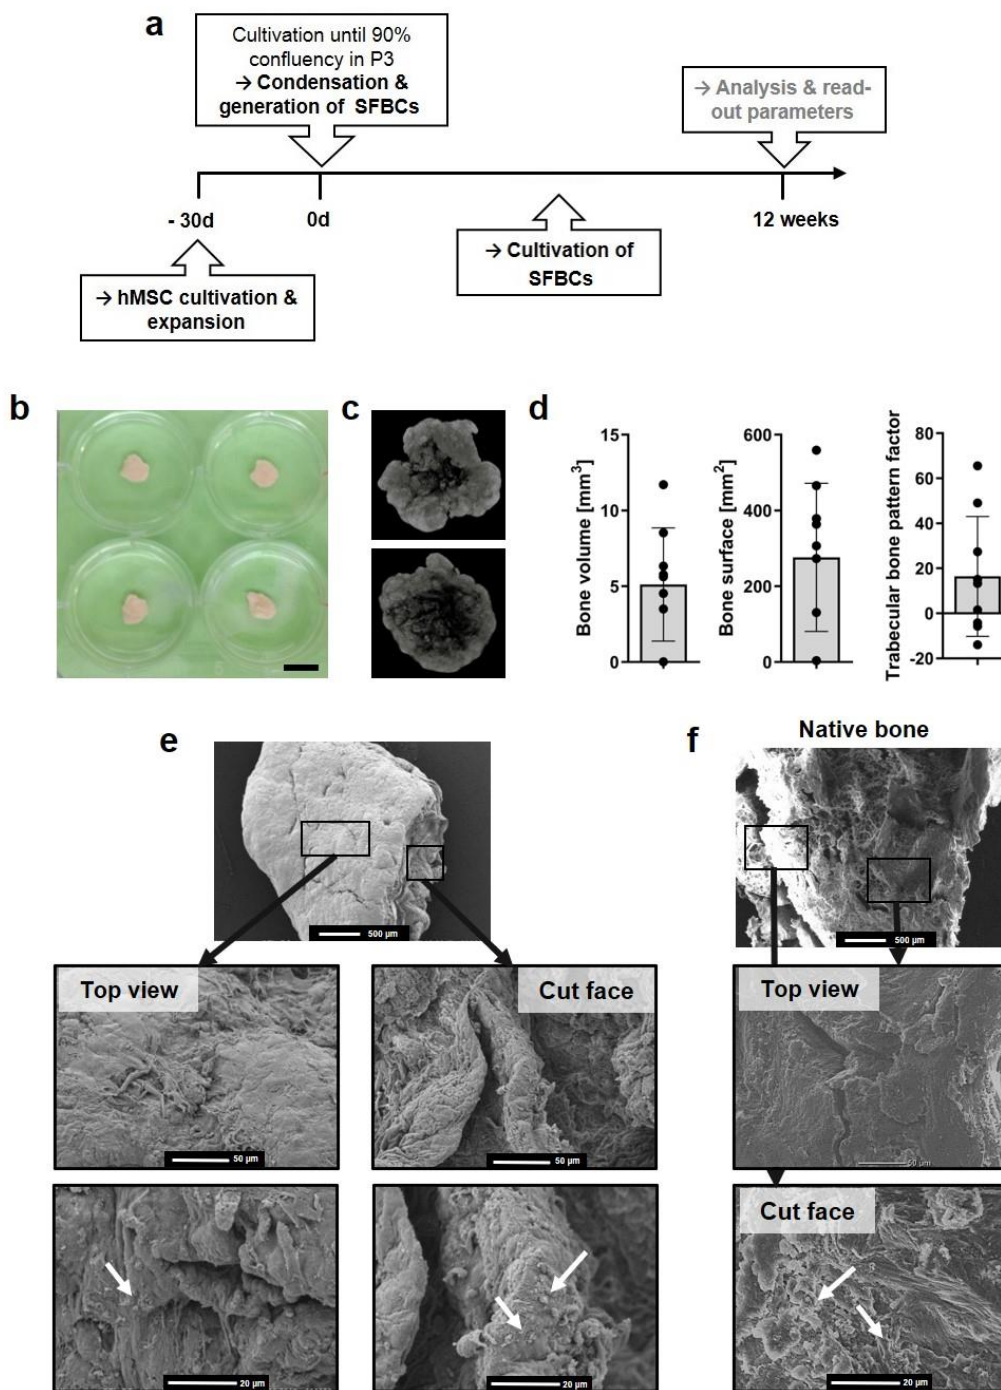

136

137 **Figure 1: Characterization of the SFBCs with respect to mineralization and structure.** (a) Study design; (b)  
 138 Exemplary images of SFBCs. Scale bar indicates 1 cm. (c) 3D reconstruction of  $\mu$ CT. Exemplary images of n= 9.  
 139 (d) Quantitative results from  $\mu$ CT analysis. Data are shown as mean  $\pm$  SD. n= 9. (e) Structural/morphological  
 140 examination of the SFBCs in comparison to (f) native bone using scanning electron microscopy. Exemplary images  
 141 of n= 3 SFBCs and n= 2 native human bone pieces. Scale bars are indicated in the images. Arrows mark isolated  
 142 crystal-like depositions.

143



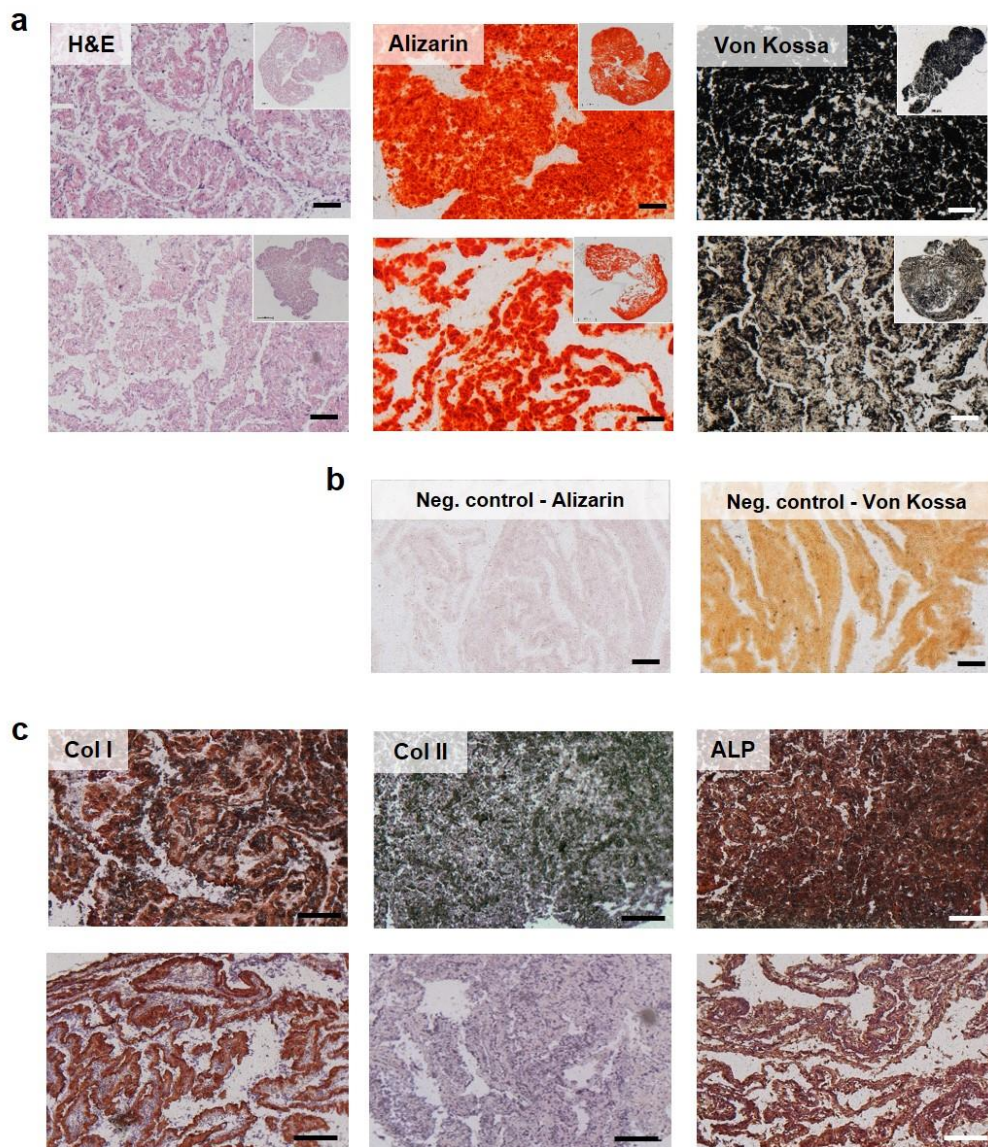

144

145 **Figure 2: Histological and immunohistochemical examination of the SFBCs.** (a) Exemplary images of H&E,  
146 Alizarin red staining and von Kossa stains. Upper row is exemplary for fully calcified SFBCs and lower row for less  
147 fully calcified SFBCs. n= 9. (b) Negative control for Alizarin red and von Kossa staining. (d) Immunohistochemical  
148 stainings for Col I, Col II and ALP. All scale bars indicate 200  $\mu$ m. All images are exemplary for n=9.

149

### 150 ***SFBCs show profound expression of bone-specific markers***

151 In order to confirm the previous findings on a molecular level, immunofluorescence staining for  
152 osteopontin (OPN) and osteocalcin (OC), two non-collagenous bone matrix proteins were  
153 analyzed and yielded the evenly distributed, distinct protein expression (**Fig. 3a, Fig. 3b**).  
154 While OPN is mainly produced by immature osteoblasts, OC is a marker of late stage  
155 osteoblasts indicating the presence of different cell states within the SFBCs. mRNA expression  
156 analysis showed high levels of osteogenic marker genes such as *secreted phosphoprotein 1*  
157 (*SPP1*) and *distal-less homeobox 5* (*DLX5*; **Fig. 3**). *SPP1* was significantly higher expressed  
158 (10-fold), while *DLX5* was higher expressed by trend (8-fold) when compared to monolayer  
159 MSCs. In contrast the early osteogenic transcription factor *runt-related transcription factor 2*

160 (*RUNX2*) and the chondrogenic marker *SRY-box transcription factor 9* (*SOX9*) were expressed  
161 on a more basal level. Interestingly, *receptor activator of NF- $\kappa$ B ligand* (*RANKL*) was highly  
162 expressed (**Fig. 3c**). Moreover, *vascular endothelial growth factor* (*VEGFA*) was significantly  
163 higher expressed (10-fold), although other hypoxia-inducible factor (HIF1) target genes such  
164 as *phosphoglycerate kinase 1* (*PGK1*), *lactate dehydrogenase A* (*LDHA*), *endothelial PAS*  
165 *domain-containing protein 1* (*EPAS*) and *HIF1* were comparably or lower (*LDHA*) expressed  
166 as in monolayer MSCs (**Fig. 3d**).

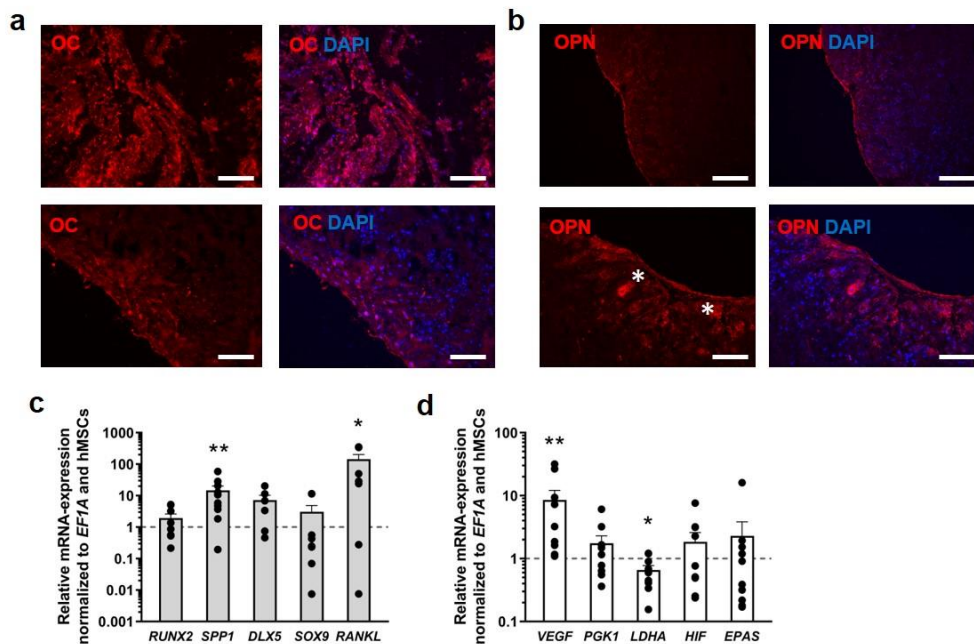

167  
168 **Figure 3: Immunofluorescence and mRNA expression analysis of SFBCs.** (a-b) Immunofluorescence staining  
169 of osteocalcin (OC, a) and osteopontin (OPN, b). White asterisks highlight cells with high OPN production. To reveal  
170 the nuclei of present cells, all slides were counter-stained with DAPI. All scale bars indicate 200 μm. Images are  
171 exemplary for n=3. (c) qPCR results of mature osteogenic markers (*SPP1*, *DLX5*) (n=8-10), markers indicative for  
172 osteoprogenitors (*RUNX2*, *SOX9*), and (d) metabolic marker *VEGFA* is highly expressed while other metabolic  
173 markers (*PGK1*, *LDHA*, *HIF1*, *EPAS*) remain at a basal level (n=10). Data are shown as mean ± SEM. For statistical  
174 analysis the results were compared to the expression level of monolayer hMSC and the Wilcoxon signed rank test  
175 was used (Table S1); \*p<0.05, \*\*p<0.01.

176

### 177 **Co-cultivation indicates biological functionality of SFBCs**

178 To confirm the functional activity of the SFBCs and to mimic the initial phase of fracture healing  
179 in an adequate experimental setting, SFBCs were directly co-cultivated with FH models under  
180 hypoxic conditions (5% CO<sub>2</sub>, ~ 1% O<sub>2</sub>) for 48h, since the initial phase of fracture healing in  
181 humans takes place within the first 72h<sup>2</sup> (**Fig. 4a**).

182 Although we have not fixed both models to each other by any technical measures, we  
183 observed a close contact of the FH with the corresponding SFBC allowing direct cell-cell-  
184 contact and crosstalk between the models. After co-cultivation for 48h, H&E staining revealed  
185 the typical cell morphology with no obvious alterations within the SFBCs, while the cells in the  
186 FH seemed to be evenly distributed. The calcification throughout the SFBC was reconfirmed



187 via von Kossa staining with no obvious calcification in the border areas of the FH (**Fig. 4b**).  
188 We have previously shown that most interesting observations in our *in vitro* FH were visible  
189 between 12-48h with respect to immune cell survival and activity<sup>18</sup>. Thus, in a first experiment,  
190 mRNA expression in the FH and the SFBC was analyzed after 12 and 48h and normalized to  
191 the mean expression at 0h (**Fig. S1 and S2**, respectively). In addition, we compared the  
192 cultivation with normal medium (NM) and osteogenic medium (OM, control) to analyze the  
193 effect of the additional osteogenic impact on the co-culture system. In short, analysis of the  
194 mRNA-expression in the FH indicated a time-consistent expression of almost all genes with  
195 only slight differences between NM and OM (**Fig. S1**). The main differences were observed  
196 for *matrix metalloproteinase (MMP2)*, significantly higher expressed at 48h when cultivated  
197 with OM. The inflammatory markers *interleukin 6 (IL6)* and *IL8* were slightly lower expressed  
198 after 12h, although gene expression was upregulated in NM and OM after 48h (**Fig. S1**). Within  
199 the SFBCs, *SPP1* was elevated after 12h of incubation with NM and was marginally lower  
200 expressed in NM and higher expressed in OM at 48h compared to 0h. *MMP2*, *VEGFA* and *IL8*  
201 were highly expressed at both time points with no differences between the cultivation medium.  
202 (**Fig. S2**).

203 Based on this data, further expression analysis and experiments were conducted after  
204 48h of co-cultivation. To verify the osteoinductive potential and biological functionality of the  
205 SFBC, we compared the results from the co-cultivated FH model with a FH only control group  
206 (treated with OM under hypoxic conditions). The normalization of the data to the starting point  
207 (0h) and the FH control revealed a substantial higher expression of *MMP2*, *VEGF*, *PGK1* and  
208 *IL6* in both groups (NM and OM) when compared to the FH control (**Fig. 4c, d**). While *RUNX2*  
209 and *IL8* were higher expressed in the NM group compared to the OM and FH control group  
210 *SPP1* was lower expressed in both groups and *LDHA* only in the NM group. Based on these  
211 findings, we concluded that the SFBCs show a comparable osteoinductive capacity as the OM  
212 medium and biological functionality (**Fig. 4c, d**).

213 Regarding the protein release, we confirmed the secretion of the pro-inflammatory IL-  
214 6 and the pro-inflammatory/-angiogenic IL-8. The pro-inflammatory granulocyte/macrophage  
215 stimulating factor (GM-CSF) and the macrophage inflammatory protein MIP were released  
216 (**Fig. 5**).

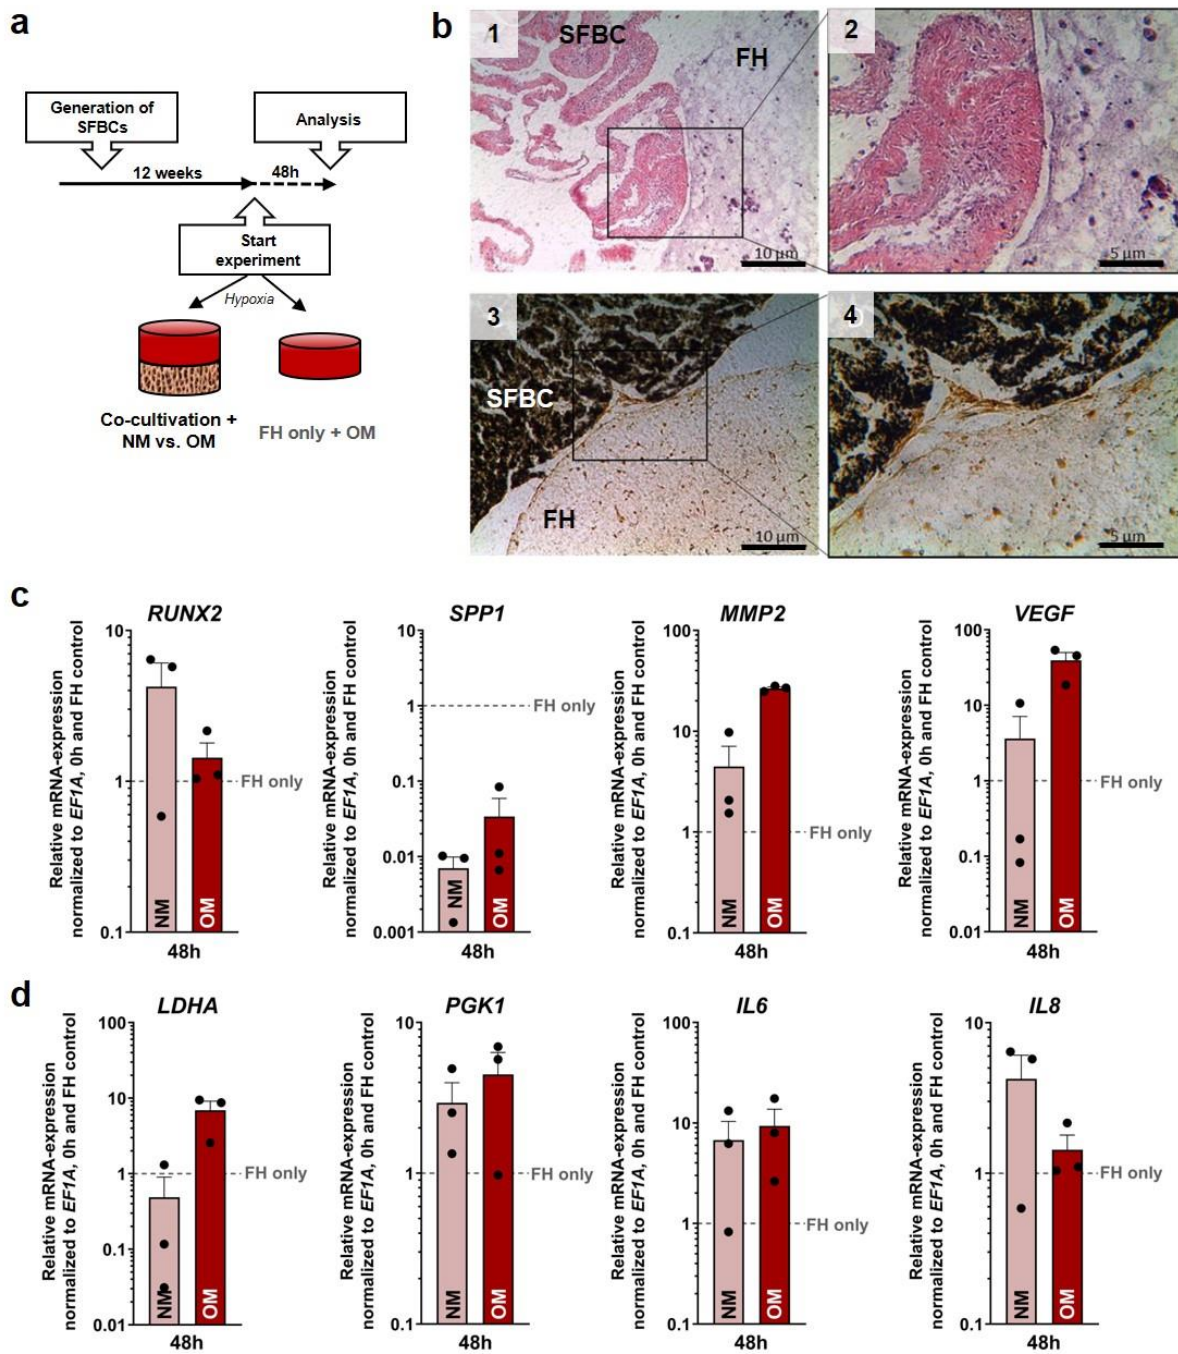

217

218 **Figure 4: Co-cultivation of SFBCs and *in vitro* FH.** (a) Experimental setup for the co-cultivation study. (b)  
 219 Exemplary images of H&E (1, 2) and von Kossa staining (3, 4). Images in the right row (2, 4) are magnifications.  
 220 Scale bars show 10 and 5  $\mu$ m. (c, d) qPCR results of the FH model of the co-cultivation system after 48h co-  
 221 cultivation under hypoxic conditions. Data is normalized to *EF1A*, 0h and the FH only control group cultured without  
 222 SFBC in OM under hypoxic conditions (median). Data are presented as mean  $\pm$  SEM (n= 3). Statistical significance  
 223 was determined using the Wilcoxon signed rank test (matched-pairs and unpaired to hypothetical value = 1; Table  
 224 S2 - S5).

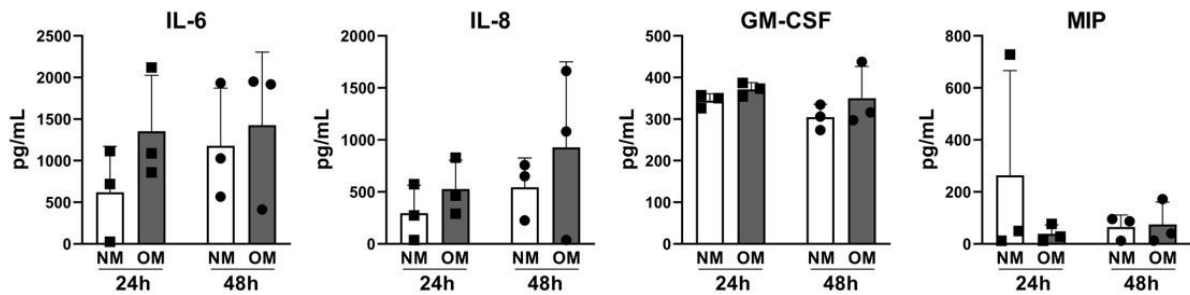

225

226 **Figure 5: Analysis of the supernatant after co-cultivation.** Supernatants were collected after 24h and 48h and  
227 analyzed via Multiplex assay. Statistical significance was determined using the Kruskal Wallis test with Dunn's  
228 multiple comparisons test (Table S4). Data is shown as mean  $\pm$  SD.

229

### 230 ***DFO treatment intensifies pro-inflammatory processes***

231 For evaluation of the model suitability as a platform to test potential therapeutics, we  
232 supplemented 250  $\mu$ M DFO for 48h and analyzed the changes in mRNA expression and  
233 protein release. DFO is an iron chelator which inhibits polyhydroxylases to chemically  
234 stabilizes HIF and is a well-known osteo-inductive substance<sup>20</sup>. After co-cultivation for 48h in  
235 NM, we found that DFO triggered the expression of osteogenic, angiogenic and hypoxia-  
236 related genes in the *in vitro* FH with barely any effect on the SFBCs (**Fig. 6a, b**). In detail, the  
237 expression of the osteogenic marker *SPP1* in the FH was higher expressed compared to the  
238 untreated control, while DFO had barely any effect on the expression of *RUNX2*. The  
239 inflammatory markers *MMP2* and *IL6* were additionally elevated while the pro-angiogenic  
240 factor *VEGFA* was highly expressed under the influence of DFO compared to the untreated  
241 control group, while *LDHA* was also elevated compared to the untreated control (**Fig. 6a**).  
242 These results confirm the biological activation capacity of DFO and the possibility to monitor  
243 these effects within a short time period. Referring to the mRNA-expression within the SFBCs,  
244 we observed a pattern very similar to untreated conditions, which were expected due to the  
245 short treatment period (**Fig. 6b**). However, when analyzing the samples treated with OM, we  
246 did not see any on the gene expression compared to the untreated control leading to the  
247 assumption that the SFBC as natural trigger is more favorable than providing another more  
248 artificial (OM) medium (**Fig. 6c, d**). Finally, the protein release of IL-6 and IL-8 was highly  
249 induced after 24h NM and DFO treatment (**Fig. 6e**).

250

251

252

253

254

255

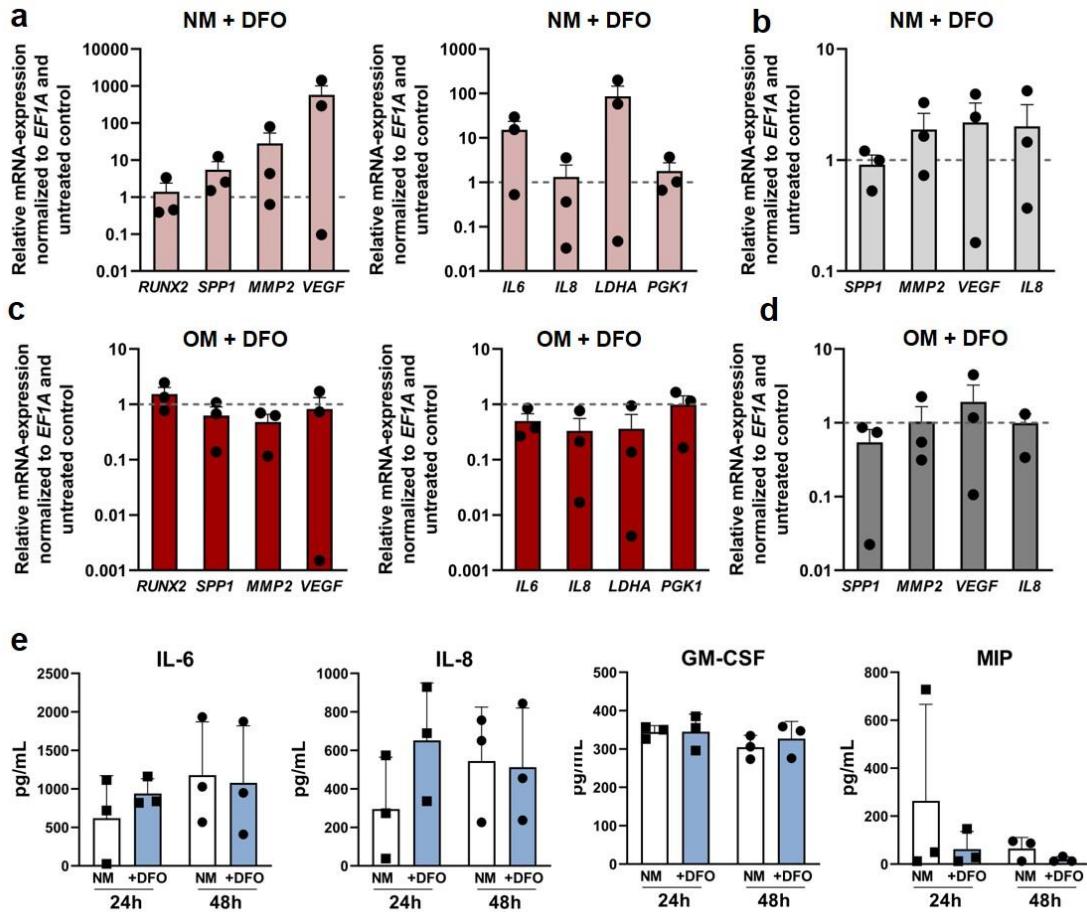

256

257 **Figure 6: Co-cultivation of SFBCs and *in vitro* FH with supplementation of DFO.** (a) qPCR results of the FH  
 258 or the (b) SFBCs after 48h co-cultivation with supplementation of NM and 250  $\mu$ M DFO. Data are normalized to  
 259 *EF1A* and the untreated control and presented as mean  $\pm$  SEM (n= 3). Statistical significance was determined using  
 260 Wilcoxon signed rank test (Table S5, S6). (c) qPCR results of the FH or the (d) SFBCs after 48h co-cultivation with  
 261 supplementation of OM and 250  $\mu$ M DFO. Data are normalized to *EF1A* and the untreated control and presented  
 262 as mean  $\pm$  SEM (n= 3). Statistical significance was determined using Wilcoxon signed rank test (Table S7, S8). (e)  
 263 Supernatants were collected after 24h and 48h and analyzed via Multiplex assay. Statistical significance was  
 264 determined using Kruskal Wallis test with Dunn's multiple comparisons test (Table S9). Data is shown as mean  $\pm$   
 265 SD.

266

## 267 Discussion

268 Our data show that the presented 3D *in vitro* fracture gap model is able to distinctly recapitulate  
 269 key features of the initial phase of fracture healing. Therefore, we first developed and  
 270 characterized SFBCs based on mesenchymal condensation, which were subsequently co-  
 271 cultivated with FH models.

272 Improved tissue engineering approaches employ mesenchymal condensation as  
 273 natural form of 3D self-assembly or self-organization consisting exclusively of the cells and  
 274 their own produced extracellular matrix (ECM)<sup>21</sup>. MSC from the bone marrow, but also the  
 275 adipose tissue as well as primary cells (osteoblasts) or induced pluripotent stem cells have  
 276 been used depending on the availability and phenotype stability. It has been described that  
 277 bone marrow-derived MSCs tend to rather mineralize than undergo chondrogenesis after



278 mesenchymal condensation<sup>17,19</sup>. Several different techniques are exerted such as the use of  
279 low attachment plates to induce spontaneous MSC aggregation, membrane-based  
280 aggregation (e.g. chitosan) or forced aggregation (via centrifugation)<sup>22</sup>.

281 The applied technique patented by Ponomarev *et al.*<sup>23</sup> exploits the capacity of MSC to  
282 undergo mesenchymal condensation on a macroscale to produce macro-tissues in a highly  
283 reproducible standardized manner without causing necrosis formation in the center<sup>24</sup>. The  
284 advantage of such macroscale approaches is the physiologically relevant size, geometry, low  
285 cell number and density compared to the matrix and mechanical properties when compared to  
286 e.g. spheroids<sup>24</sup>. However, the generation and examination of these constructs are time-  
287 consuming and require high numbers of cells limiting the throughput of the system but enabling  
288 the performance of several analyses from one model. Here, we reported the bone-like structure  
289 and ongoing calcification/mineralization of the SFBCs that were verified by *in vitro*  $\mu$ Ct (**Fig. 1**)  
290 and histology/immunohistochemistry, showing pronounced expression of ALP and Col I in the  
291 absence of Col II (**Fig. 2**). These findings are comparable to other studies using MSC  
292 aggregates analyzed after 1 to 3 weeks<sup>25,26</sup>. The morphology and structure of the SFBCs  
293 resemble immature woven bone with regard to the body structure. To identify bone-  
294 representative cell types, we applied immunofluorescence staining. Since osteoblasts and  
295 osteocytes are the characteristic cells in native bone, we stained for OPN as well as OC. OPN  
296 - a glycol-phosphoprotein<sup>27</sup> - is mainly expressed in immature osteoblasts and OC can be  
297 found in late stage osteoblasts currently transforming to osteocytes. Thus, we have  
298 heterogenic differentiation and maturation states within the SFBCs, indicating a heterogeneous  
299 cell population in functional balance. With respect to the mRNA expression, we observed  
300 augmented expression of osteogenic relevant markers such as *SPP1*, *DLX5* and *VEGFA* (**Fig.**  
301 **3**). *SPP1*, the coding gene for OPN, is hereby the most distinct upregulated gene, coherent  
302 with the expression of OPN within the immunofluorescence staining. Muraglie *et al.* observed  
303 comparable trends including a two to eightfold increase in OC and OPN expression in MSC  
304 aggregates cultivated in low attachment plates<sup>28</sup>. Since *RUNX2* is an early upstream  
305 transcription factor, high expression on mRNA-level is expected 3 to 7 days after osteogenic  
306 induction<sup>26</sup>. After three weeks, the process of ossification and cellular differentiation towards  
307 the osteogenic lineage is already in an advanced state<sup>29,30</sup>. *VEGFA* is an essential coordinator,  
308 not only of angiogenetic processes and important for fracture healing, but also in the process  
309 of endochondral ossification<sup>31</sup> and is known to enhance osteogenic differentiation *in vitro*<sup>32</sup>.  
310 Interestingly, other HIF1 target genes such as *PGK1*, *EPAS* and *HIF1* were comparably  
311 expressed as in monolayer MSCs, also *LDHA* was downregulated (**Fig. 3e**). Since the SFBCs  
312 were not cultivated under hypoxic conditions, the increased expression of *VEGFA* might result  
313 from an alternative pathway, e.g. induced by transforming growth factor beta 1 (TGF- $\beta$ 1)<sup>33</sup>.  
314 *DLX5*, an important transcription factor in osteogenesis and bone development<sup>34</sup>, is also highly

315 expressed within the SFBCs, also indicating an intense ossification process. RANKL is also  
 316 expressed in mature osteoblasts, differentiating into osteocytes and also regulates  
 317 osteoblastogenesis indicating the presence of late-stage osteoblasts<sup>35</sup>.

318 After characterizing their bone-like quantities, we co-cultivated the SFBCs with  
 319 *in vitro* FHs in order to evaluate the capability of the SFBCs to act as an osteogenic inducer  
 320 and to recapitulate key features of the initial phase of fracture healing closely to the *in vivo*  
 321 situation. Previously, we developed an *in vitro* FH model, incubated in osteogenic induction  
 322 medium, which closely reflects the *in vivo* situation<sup>18,36</sup>. One of the main findings was the  
 323 importance of hypoxia. Therefore, we included hypoxic conditions in our co-cultivation setup.  
 324 The co-cultivation of the *in vitro* FH and SFBCs in NM for up to 48h under hypoxic conditions  
 325 revealed significant initiation of ongoing cellular processes (mRNA-level) for adaptation to  
 326 hypoxia and osteogenic induction within the FH (**Fig. S1, S2**). These findings are in accordance  
 327 with results from an *ex vivo* study and an *in vitro* FH model conducted in our group (**Table**  
 328 **1**)<sup>18,37</sup>.

329 **Table 1:** Gene expression data from an *ex vivo* study using primary human fracture hematomas obtained between  
 330 48 and 72 h after trauma (n=40), the *in vitro* human FH model (n=12, 48 h incubation under hypoxia and the FHs  
 331 of the *in vitro* fracture gap model (n=3, 48 h incubation under hypoxia in normal medium).

| Gene symbol  | <i>ex vivo</i> FHs<br>(< 72 h) | <i>in vitro</i> human FHs<br>(48 h hypoxia) | <i>in vitro</i> fracture gap<br>model (48 h hypoxia) |
|--------------|--------------------------------|---------------------------------------------|------------------------------------------------------|
| <i>RUNX2</i> | ↑                              | ↑**                                         | ↑                                                    |
| <i>SPP1</i>  | ↑*                             | ↑****                                       | ↑                                                    |
| <i>VEGFA</i> | ↑*                             | ↑***                                        | ↑                                                    |
| <i>IL8</i>   | ↑***                           | ↑**                                         | ↑                                                    |
| <i>IL6</i>   | ↑***                           | ↑                                           | ↑                                                    |
| <i>LDHA</i>  | ↑**                            | ↑***                                        | ↑                                                    |
| <i>MMP2</i>  | n.a.                           | ↑*                                          | ↑                                                    |

332 Based on the comparative analysis with an FH control, we concluded that the SFBCs show a  
 333 comparable osteoinductive capacity as the OM medium and biological functionality indicated  
 334 by e.g. *VEGF* and *MMP2* (**Fig. 4**). Interestingly, *SPP1* was noticeably lower expressed in the  
 335 FH when co-cultivated with SFBCs compared to the FH control, which could be explained by  
 336 either the higher amount of OPN provided by the SFBC (**Fig. 3**) or the considerable high  
 337 expression/concentration of IL-6 (**Fig. 4 and 5**), as previously reported<sup>38</sup>. The level of pro-  
 338 inflammatory cytokines (e.g. IL-6 and IL-8) was abundant, which has been also observed in *ex*  
 339 *vivo* samples from patients (**Fig. 5**)<sup>2,5,37</sup>. The microenvironment of the fracture hematoma is  
 340 described by hypoxia, high lactate and low pH due to the disruption of vessels, cell death of  
 341 e.g. erythrocytes and the lack of nutrients. This cytotoxic environment needs to be counter-  
 342 regulated to allow the invasion of regenerative cells. Therefore, we included whole human  
 343

344 blood instead of isolated peripheral blood mononuclear cells (PBMCs). At the initial stage, the  
345 microenvironment in the fracture hematoma is acidotic and switched to neutral and slightly  
346 alkaline during the regeneration process<sup>39</sup> which can be triggered by hypoxia. Interestingly,  
347 upon co-cultivation *LDHA* was highly upregulated in the FH model (**Fig. S1**).

348 Furthermore, the effect of certain immune cells during the initial phase of fracture  
349 healing has been studied in detail during the last decade. Lymphocytes play a crucial role as  
350 shown in *RAG1(-/-)* mice supposing a detrimental effect of adaptive immune cells<sup>40</sup>. A negative  
351 impact was reported for the presence of *CD8<sup>+</sup>* cytotoxic T-cells in humans and mice<sup>41</sup>, while  
352 *CD4<sup>+</sup>* cells have been shown to enhance osteogenic differentiation *in vitro* and upregulated  
353 osteogenic markers e.g. *RUNX2* or *OC*<sup>42</sup>. This clearly indicates the need to combine bone and  
354 immune cells in *in vitro* approaches to recapitulate the crosstalk, environment and key features  
355 of the *in vivo* situation.

356 With respect to the DFO treatment, we found an upregulation of *HIF*-target genes  
357 (*VEGFA* and *LDHA*) indicating the effectivity of DFO to stabilize *HIF* (**Fig. 6**). In addition, pro-  
358 inflammatory processes were more pronounced, which is in accordance with current findings  
359 in a mouse-osteotomy-model revealing the activation of e.g. *C-X-C motif chemokine ligand 3*  
360 (*Cxcl3*) or *metallothionein 3 (Mt3)* expression at day 3 after application of DFO in the fracture  
361 gap<sup>20</sup>. We did not expect a strong upregulation of osteogenic markers or changes in the  
362 SFBCs, which normally require longer treatment periods<sup>29,43</sup>.

363 Nevertheless, there are many ways to foster the current approach. In order to improve  
364 the current protocol to generate SFBC, different approaches such as the addition of specific  
365 growth factors, e.g. BMPs, fibroblast growth factors (FGFs) or VEGFs, enhancing the  
366 differentiation and bone formation *in vitro* can be considered to fasten up the generation period  
367 in the future. Furthermore, bioreactors can be used to approximate the environment to the  
368 actual *in vivo* situation by dynamic culturing and restrained environment, while overcoming the  
369 lack of nutrient transfer and combining cells with scaffolds<sup>44</sup>. Bioreactors also provide the  
370 possibility to withdraw toxic and cell apoptotic signals perhaps allowing a longer cultivation  
371 period of the fracture gap model.

372 Taken together, within our 3D *in vitro* fracture gap model, we have been able to  
373 distinctly mimic key features of the initial phase of fracture healing which can be used i) to  
374 study potential underlying mechanism of fracture healing disorders, especially with respect to  
375 immunologically restricted patients<sup>4,5</sup>, requiring the crosstalk between immune cells and bone  
376 and ii) as a prediction tool for potential new therapeutic strategies actively implementing the  
377 3R principle.

378

## 379 **Material & Methods**

### 380 ***Bone marrow derived MSC isolation, cultivation and characterization***

381 Human mesenchymal stromal cells (hMSC) were isolated from bone marrow of patients  
 382 undergoing total hip replacement (provided by the Center for Musculoskeletal Surgery,  
 383 Charité-Universitätsmedizin Berlin; donor list in **Table 2**). All protocols were approved by the  
 384 Charité-Universitätsmedizin Ethics Committee and performed according to the Helsinki  
 385 Declaration (ethical approval EA1/012/13). MSC isolation was performed as described in detail  
 386 before<sup>18,45</sup>. Briefly, bone marrow was transferred cell culture flask, covered with normal  
 387 expansion medium (NM) containing DMEM+GlutaMAX (Gibco), 10 (v/v) % FCS (Biowest), 1  
 388 (v/v) % Penicillin/Streptomycin (Gibco), 20 (v/v) % StemMACS MSC Expansion Media XF  
 389 (Miltenyi Biotech) and incubated at 37°C in 5% CO<sub>2</sub> atmosphere (app. 18% O<sub>2</sub>). Medium was  
 390 changed after 3-4 days when cells became adherent. Isolated cells were expanded in at 37  
 391 °C, 5% CO<sub>2</sub>. Medium exchange was performed weekly and passaging with Trypsin-EDTA  
 392 (Gibco) was conducted at a cellular confluency of 80-90%. For characterization, MSCs were  
 393 evaluated at passage 3 for their differentiation potential (osteogenic, adipogenic) and the  
 394 presence and absence of specific cell surface markers (MSC Phenotyping Kit, Miltenyi  
 395 Biotech) as described in detail before<sup>18,45</sup>. Human EDTA- blood was collected from healthy  
 396 donors with written consent<sup>18</sup>.

397  
 398

**Table 2:** hMSC and blood donor information and conducted experiments.

| Donor   | Age | Sex | Type of experiments                                      | Used methods                                                                                    |
|---------|-----|-----|----------------------------------------------------------|-------------------------------------------------------------------------------------------------|
| MSC 1   | 71  | m   | Characterization of SFBCs                                | μCt, gene expression analysis,<br>histology, immunofluorescence                                 |
| MSC 2   | 77  | m   |                                                          |                                                                                                 |
| MSC 3   | 69  | m   |                                                          |                                                                                                 |
| MSC 4   | 69  | w   |                                                          | μCt, gene expression analysis,<br>histology                                                     |
| MSC 5   | 81  | w   |                                                          |                                                                                                 |
| MSC 6   | 49  | w   |                                                          |                                                                                                 |
| MSC 7   | 59  | m   |                                                          |                                                                                                 |
| MSC 8   | 80  | w   |                                                          |                                                                                                 |
| MSC 9   | 51  | m   |                                                          |                                                                                                 |
| MSC 10  | 75  | m   | Characterization of SFBCs,<br>Co-cultivation experiments | μCt, gene expression analysis,<br>histology, gene expression analysis,<br>DFO treatment studies |
| MSC 11  | 68  | w   | Co-cultivation experiments                               | Gene expression analysis, DFO<br>treatment studies                                              |
| MSC 12  | 56  | m   |                                                          |                                                                                                 |
| Blood 1 | 37  | M   |                                                          |                                                                                                 |
| Blood 2 | 26  | M   |                                                          |                                                                                                 |
| Blood 3 | 38  | M   |                                                          |                                                                                                 |



### 399 ***Fabrication of the 3D bone-like scaffold-free constructs (SFBCs)***

400 SFBCs were produced based on a patented protocol (patent no.: EP1550716B1)<sup>46</sup> which was  
401 modified by applying osteogenic medium to induce osteogenic differentiation after 1 week and  
402 no application of biomechanical loading to avoid matrix destruction due to mineral formation.  
403 The osteogenic medium for generation and maturation contained DMEM/F-12, 10% (v/v) FCS,  
404 1% (v/v) streptomycin/penicillin, 10 mM  $\beta$ -glycerophosphate and 10 nM dexamethasone  
405 (Sigma Aldrich). Approx.  $10\text{-}20 \times 10^5$  hMSC/cm<sup>2</sup> were cultivated in expansion medium until  
406 reaching confluency and forming a monolayer cell sheet. These cell sheets were detached and  
407 centrifuged at 350 g for 15 min at RT. Afterwards, the resulting cell aggregates were cultivated  
408 for up to one week with medium exchange every day. Cell aggregates were then transferred  
409 to a multi-well plate and cultured for up 12 weeks until performing characterization or co-  
410 cultivation with the FH model.

### 411 ***Generation of FH and co-cultivation – The fracture gap model***

412 The FH models were generated as described previously<sup>18</sup>. In brief, per FH  $2.5 \times 10^5$  hMSCs  
413 per well were centrifuged for 3 min at 300 g in a 96-well plate (U-bottom). Afterwards, the cell  
414 pellet was resuspended in 100  $\mu$ L of EDTA-blood and subsequently mixed with a 10 mM CaCl<sub>2</sub>  
415 solution (solved in PBS). After an incubation time of 30 min at 37 °C, 5% CO<sub>2</sub> the FH were  
416 placed on a SFBC with direct contact and transferred into either NM or osteogenic medium  
417 (OM) containing NM supplemented with 10 mM  $\beta$ -glycerophosphate and 0.1 mM L-ascorbic  
418 acid-2-phosphate.

419 For the treatment study, 250  $\mu$ M DFO (Sigma Aldrich) was supplemented to the medium. The  
420 generated fracture gap models were incubated under hypoxic (37 °C, 5% CO<sub>2</sub> and ~ 1% O<sub>2</sub> -  
421 flushed with N<sub>2</sub>) conditions in a humidified atmosphere for up to 48h.

### 422 ***In vitro micro computed tomography ( $\mu$ CT)***

423 SFBCs were scanned at a nominal resolution of 8  $\mu$ m, with a SkyScan 1172 high-resolution  
424 microCT (Bruker). X-ray tube voltage was set at 80 kV, 124  $\mu$ A with maximized power of 10W  
425 and a 0.5 mm aluminum filter was employed to reduce beam hardening effects. The scan orbit  
426 was 360 degrees with a rotation step of 0.2 degree. For reconstruction the Bruker NRecon  
427 software accelerated by GPU was used and Gaussian smoothing, ring artifact reduction,  
428 misalignment compensation, and beam hardening correction were applied. XY alignment was  
429 corrected with a reference scan to determine the thermal shift during scan time. The CTAn  
430 software (Bruker) was used to analyze the total VOI of SFBCs. The threshold for bony tissue  
431 was set globally (determined by the Otsu method) and kept constant for all SFBCs. For  
432 analysis we used the bone volume (BV), the bone surface (BS) and the trabecular pattern  
433 factor (TBPf)<sup>47</sup> as measured and calculated by the software.

#### 434 **Scanning electron microscopy (SEM)**

435 Samples were fixated with 2.5 (v/v) % glutaraldehyde (fixation for 10 min), dehydrated with  
436 increasing alcohol concentration 30 (v/v) % - 100 (v/v) % (5 steps) and incubation with 100%  
437 hexamethyldisilazane (all Sigma Aldrich). Subsequently, the samples were transferred to a  
438 sample holder and gold coating was performed with a fine gold coater JFC-1200 (JEOL). For  
439 electron microscopy, the JCM-6000 Plus NeoScope (JEOL) was used for imaging, high  
440 vacuum was adjusted.

#### 441 **Histological stainings**

442 The embedding and slice preparation of the SFBCs was conducted according to the Kawamoto  
443 *et al.*<sup>48</sup> method to prepare slices of undecalcified bones. In detail, the SFBCs were fixated for  
444 6h in a 4 (v/v) % paraformaldehyde solution (PFA; Carl Roth) followed by an ascending sucrose  
445 solution treatment (10 (w/v) %, 20 (w/v) % and 30 (w/v) %) for 24h, respectively and afterwards  
446 cryo-embedded with SCEM medium (Sectionlab). Slices were produced with a cryotom using  
447 cryofilms (Sectionlab) and afterwards air dried for 20 min and fixated with 4 (v/v) % PFA prior  
448 to every histological or immunohistological staining on a microscope slide.

449 H&E staining was performed as described previously<sup>24</sup>. In short, slices were fixed with 4 (v/v)  
450 % PFA (10 min), washed with distilled water and stained with Harris's hematoxylin solution  
451 (Merck Millipore). Staining was followed by several washing steps, a differentiation step (0.25  
452 (v/v) % concentrated HCl) and a second staining step in 0.2 (w/v) % eosin (Chroma Waldeck).  
453 Staining was finished by differentiation in 96 (v/v) % and 100 (v/v) % ethanol, fixation with xylol  
454 and covering with Vitro-Clud (R. Langenbrinck GmbH).

455 Alizarin Red S staining was conducted by applying slices after fixation and washing to the 2  
456 (w/v) % Alizarin Red S staining solution (Sigma Aldrich; pH = 4.1-4.3) for 10 min. Afterwards  
457 slices were washed in distilled water and differentiation was performed in 0.1 (v/v) % HCL  
458 solved in ethanol and fixed by washing two times with 100% ethanol before xylol fixation and  
459 covering.

460 Von Kossa staining was conducted according to the following protocol: air drying, fixation and  
461 washing as described above, 3% (w/v) silver nitrate solution (10 min), washing step with  
462 distilled water, sodium carbonate formaldehyde solution (2 min), washing step with tap water,  
463 5% (w/v) sodium thiosulphate solution (5 min), washing step with tap water and distilled water,  
464 ascending ethanol series (70 (v/v) % - 100 (v/v) %), fixation in xylol and covering.

465 For Col I, II and ALP staining, slices were rehydrated with phosphate buffered saline (PBS)  
466 treated with 3 (v/v) % H<sub>2</sub>O<sub>2</sub> (30 min), washed with PBS, blocked with 5% normal horse or goat  
467 serum (Vector Laboratories) in 2 (w/v) % bovine serum albumin (BSA), and incubated  
468 overnight with primary antibodies at 4 °C (Col I antibody: ab6308, 1:500, Abcam; Col II  
469 antibody, 1:10, Quartett Immunodiagnostika; ALP antibody, ab95462, Abcam). Afterwards,

470 slices were washed and treated with 2 (v/v) % secondary antibody (biotinylated horse anti-  
471 mouse IgG antibody – Col I and Col II; biotinylated goat anti-rabbit IgG antibody - ALP, Vector  
472 Laboratories) diluted in 2 (v/v) % normal horse/goat serum/2 (v/v) % BSA/PBS (30 min),  
473 washed with PBS, incubated with avidin-biotin complex (Vectastain Elite ABC HRP Kit, Vector  
474 Laboratories) (50 min), washed with PBS, incubated with DAB under microscopic control with  
475 time measurement (DAB peroxidase (HRP) Substrate Kit, Vector Laboratories) and stopped  
476 with PBS. For counterstaining slices were washed with distilled water and stained with Mayer's  
477 hematoxylin (Sigma Aldrich), washed with tap water and covered with Aquatex (Merck  
478 Millipore). Pictures were taken with the Axioskop 40 optical microscope (Zeiss) using the  
479 corresponding AxioVision microscopy software. Von Kossa staining was quantified using  
480 ImageJ and the threshold tool to mark positive (black) and negative (brown) stained areas.

### 481 ***Immunofluorescence***

482 For the immunofluorescence staining, the slides were rehydrated with PBS and blocked with  
483 PBS with 5 (v/v) % FCS for 30 min at RT. Primary osteopontin antibody (mouse anti-human,  
484 Abcam) or osteocalcin (rabbit anti-human, Abcam) was diluted 1:50 in PBS/5 (v/v) % FCS/0.1  
485 (v/v) % Tween 20 and incubated for 2h. After washing with PBS/0.1% Tween 20, the secondary  
486 antibody (donkey anti-goat A568; Life Technologies/Thermo Scientific) was diluted 1:500 in  
487 PBS/5 (v/v) % FCS/0.1 (v/v) % Tween 20 and applied for 1h. Pictures were taken with a  
488 Keyence fluorescence microscope BZ 9000 (Keyence) using the DAPI, TexasRed and Cy5  
489 channels.

### 490 ***RNA isolation and quantitative PCR (qPCR)***

491 SFBCs were transferred to RLT-buffer (Qiagen, Germany) with 1% 2-Mercaptoethanol (Serva)  
492 and disrupted using the Qiagen Tissue Ruptor (Qiagen). Total RNA was extracted using the  
493 RNeasy Fibrous Tissue Mini Kit (Qiagen) according to the manufacturers' instructions and the  
494 RNA concentration was determined using the Nanodrop ND-1000 (PeqLab). RNA was stored  
495 at -80 °C until further processing. The same RNA isolation method was preceded for the  
496 SFBCs after co-cultivation.

497 After co-cultivation, the cells of the FH were filtered through a cell strainer (Corning). After  
498 centrifugation for 10 min at 300 g, the cell pellet was resuspended in 350 µL RLT buffer with  
499 3.5 µL 2-Mercaptoethanol and total RNA was extracted using the RNeasy Fibrous Tissue Mini  
500 Kit according to the manufacturers' instructions.

501 The cDNA for both the FH and the SFBCs was synthesized by reverse transcription using  
502 TaqMan Reverse Transcription Reagents (Applied Biosystems). qPCR was performed using  
503 the DyNAmo Flash SYBR Green qPCR Kit (Thermo Fisher) and the Stratagene Mx3000P  
504 (Agilent Technologies). Initial denaturation was for 7 min at 98 °C. Afterwards 50 cycles with 5  
505 sec at 98 °C, 7 sec at 56 °C and 9 sec at 72 °C were performed. The melting curve was

506 analyzed through stepwise increasing the temperature from 50 °C to 98 °C every 30 sec. All  
507 primers were purchased from TIB Molbiol (**Table S10**). For the gene expression of the SFBCs,  
508 data were normalized to the expression of *eukaryotic translation elongation factor 1 alpha 1*  
509 (*EF1A*) and to the corresponding MSC culture in 2D, using the delta-delta-Ct-method. For the  
510 gene expression in the fracture gap model, data were normalized to the expression of *EF1A*  
511 using the deltaCt method and 0h using the deltadeltaCt method.

### 512 **Cytokine and chemokine quantification in supernatants**

513 Supernatants were immediately stored at -80 °C after 48h co-cultivation. The concentration  
514 [pg/mL] of cytokines and chemokines was determined using multiplex suspension assay (Bio-  
515 Rad Laboratories) following the manufacturers' instructions. Following cytokines and  
516 chemokines (lower detection limit) were measured: IL-1 $\beta$  (7.55 pg/mL), IL-2 (18.99 pg/mL), IL-  
517 4 (4.13 pg/mL), IL-5 (20.29 pg/mL), IL-6 (25.94 pg/mL), IL-7 (16.05 pg/mL), IL-8 (37.9 pg/mL),  
518 IL-10 (37.9 pg/mL), IL-13 (7.21 pg/mL), IL-17 (24.44 pg/mL), interferon-gamma (IFN $\gamma$ , 56.32  
519 pg/mL), tumor necrosis factor-alpha (TNF $\alpha$ , 59.53 pg/mL), monocyte chemotactic protein-1  
520 (MCP-1, 27.02 pg/mL), macrophage inflammatory protein MIP-1 $\beta$  (6.27 pg/mL), granulocyte  
521 colony-stimulating factor (G-CSF, 50.98 pg/mL) and granulocyte-macrophage colony-  
522 stimulating factor (GM-CSF, 11.82 pg/mL)

### 523 **Statistical analysis**

524 Statistical tests were performed using GraphPad Prism Software version 8. Statistical  
525 differences towards a hypothetical value were determined by Wilcoxon signed rank test  
526 (unpaired). With respect to the co-cultivation studies, differences between two groups were  
527 determined with Wilcoxon matched-pairs signed rank test or between more groups with the  
528 Kruskal Wallis test with Dunn's multiple comparisons test. Probability values of  $p < 0.05$  were  
529 considered to be statistically significant ( $***p < 0.001$ ,  $**p < 0.01$ ,  $*p < 0.05$ ). Details on the  
530 statistics per Figure are displayed in the Supplementary Information.

531

### 532 **Acknowledgments**

533 The authors would like to thank Manuela Jakstadt for excellent technical assistance. AL, FB,  
534 AD, MP and TG are members of Berlin-Brandenburg research platform BB3R and Charité 3<sup>R</sup>.  
535 This study was funded by the German Federal Ministry for Education and Research (BMBF)  
536 (project no. 031A334). AL is currently being supported by the Joachim Herz Foundation (Add-  
537 on Fellowship 2019). The work of TG was funded by the Deutsche Forschungsgemeinschaft  
538 (353142848). Funding bodies did not have any role in designing the study, in collecting,  
539 analyzing and interpreting the data, in writing this manuscript, and in deciding to submit it for  
540 publication.



## 541 Contributions

542 Study design: AL, TG, MP; Data collection and analysis: MP, AL, IP, AD, CB, YC; Data  
543 discussion and interpretation: FB, CTR, AL, TG, MP; Drafting manuscript: MP, AL, TG;  
544 Revising manuscript: FB, IP, CTR, PH.

545

## 546 Conflict of interest

547 The authors declare no conflict of interests.

548

## 549 References

- 550 1 Claes, L., Recknagel, S. & Ignatius, A. Fracture healing under healthy and inflammatory  
551 conditions. *Nature reviews. Rheumatology* **8**, 133-143, doi:10.1038/nrrheum.2012.1  
552 (2012).
- 553 2 Hoff, P. *et al.* Immunological characterization of the early human fracture hematoma.  
554 *Immunologic research* **64**, 1195-1206, doi:10.1007/s12026-016-8868-9 (2016).
- 555 3 Oe, K. *et al.* An in vitro study demonstrating that haematomas found at the site of  
556 human fractures contain progenitor cells with multilineage capacity. *The Journal of*  
557 *bone and joint surgery. British volume* **89**, 133-138, doi:10.1302/0301-  
558 620x.89b1.18286 (2007).
- 559 4 Hoff, P. *et al.* Immunologically restricted patients exhibit a pronounced inflammation  
560 and inadequate response to hypoxia in fracture hematomas. *Immunologic research* **51**,  
561 116-122, doi:10.1007/s12026-011-8235-9 (2011).
- 562 5 Hoff, P. *et al.* A Pronounced Inflammatory Activity Characterizes the Early Fracture  
563 Healing Phase in Immunologically Restricted Patients. *International journal of*  
564 *molecular sciences* **18**, DOI: 10.3390/ijms18030583, doi:10.3390/ijms18030583  
565 (2017).
- 566 6 Winkler, T., Sass, F. A., Duda, G. N. & Schmidt-Bleek, K. A review of biomaterials in  
567 bone defect healing, remaining shortcomings and future opportunities for bone tissue  
568 engineering: The unsolved challenge. *Bone & Joint Research* **7**, 232-243,  
569 doi:10.1302/2046-3758.73.BJR-2017-0270.R1 (2018).
- 570 7 Grundnes, O. & Reikeras, O. The importance of the hematoma for fracture healing in  
571 rats. *Acta orthopaedica Scandinavica* **64**, 340-342, doi:10.3109/17453679308993640  
572 (1993).
- 573 8 Kolar, P. *et al.* The early fracture hematoma and its potential role in fracture healing.  
574 *Tissue engineering. Part B, Reviews* **16**, 427-434, doi:10.1089/ten.TEB.2009.0687  
575 (2010).
- 576 9 Schmidt-Bleek, K., Petersen, A., Dienelt, A., Schwarz, C. & Duda, G. N. Initiation and  
577 early control of tissue regeneration - bone healing as a model system for tissue  
578 regeneration. *Expert opinion on biological therapy* **14**, 247-259,  
579 doi:10.1517/14712598.2014.857653 (2014).
- 580 10 Schmidt-Bleek, K. *et al.* Inflammatory phase of bone healing initiates the regenerative  
581 healing cascade. *Cell and tissue research* **347**, 567-573, doi:10.1007/s00441-011-  
582 1205-7 (2012).
- 583 11 Bernhardt, A., Lode, A., Peters, F. & Gelinsky, M. Optimization of culture conditions for  
584 osteogenically-induced mesenchymal stem cells in beta-tricalcium phosphate ceramics  
585 with large interconnected channels. *J Tissue Eng Regen Med* **5**, 444-453,  
586 doi:10.1002/term.331 (2011).
- 587 12 Burska, A. N. *et al.* Dynamics of Early Signalling Events during Fracture Healing and  
588 Potential Serum Biomarkers of Fracture Non-Union in Humans. *J Clin Med* **9**,  
589 doi:10.3390/jcm9020492 (2020).

- 590 13 Schlundt, C. *et al.* Immune modulation as a therapeutic strategy in bone regeneration.  
591 *Journal of experimental orthopaedics* **2**, 1, doi:10.1186/s40634-014-0017-6 (2015).
- 592 14 Haffner-Luntzer, M. *et al.* Review of Animal Models of Comorbidities in Fracture-  
593 Healing Research. *J Orthop Res* **37**, 2491-2498, doi:10.1002/jor.24454 (2019).
- 594 15 Peric, M. *et al.* The rational use of animal models in the evaluation of novel bone  
595 regenerative therapies. *Bone* **70**, 73-86, doi:10.1016/j.bone.2014.07.010 (2015).
- 596 16 Scheinpflug, J. *et al.* Journey into Bone Models: A Review. *Genes* **9**,  
597 doi:10.3390/genes9050247 (2018).
- 598 17 Dickhut, A. *et al.* Calcification or dedifferentiation: requirement to lock mesenchymal  
599 stem cells in a desired differentiation stage. *Journal of cellular physiology* **219**, 219-  
600 226, doi:10.1002/jcp.21673 (2009).
- 601 18 Pfeiffenberger, M. *et al.* The in vitro human fracture hematoma model - a tool for  
602 preclinical drug testing *ALTEX - Alternatives to animal experimentation.*,  
603 doi:10.14573/altex.1910211 (2020).
- 604 19 Farrell, M. J. *et al.* Functional properties of bone marrow-derived MSC-based  
605 engineered cartilage are unstable with very long-term in vitro culture. *Journal of*  
606 *biomechanics* **47**, 2173-2182, doi:10.1016/j.jbiomech.2013.10.030 (2014).
- 607 20 Lang, A., Helfermeier, S., Stefanowski, J., Kuppe, A., Sunkara, V., Pfeiffenberger, M.,  
608 Wolter, A., Damerau, A., Hemmati-Sadeghi, J., Ringe, J., Hauser, A.E., Löhning, M.,  
609 Perka, C., Duda, G.N., Hoff, P., Schmidt-Bleek, K., Gaber, T., Buttgerit, F. HIF-  
610 stabilization as possible treatment towards fracture healing disorders. *in preparation for*  
611 *submission* (2020).
- 612 21 DuRaine, G. D., Brown, W. E., Hu, J. C. & Athanasiou, K. A. Emergence of scaffold-  
613 free approaches for tissue engineering musculoskeletal cartilages. *Ann Biomed Eng*  
614 **43**, 543-554, doi:10.1007/s10439-014-1161-y (2015).
- 615 22 Sart, S., Tsai, A.-C., Li, Y. & Ma, T. Three-dimensional aggregates of mesenchymal  
616 stem cells: cellular mechanisms, biological properties, and applications. *Tissue*  
617 *engineering. Part B, Reviews* **20**, 365-380, doi:10.1089/ten.TEB.2013.0537 (2014).
- 618 23 Ponomarev, I. V., Kochneva, L. M. & Barnewitz, D. Effect of 3D chondrocyte culturing  
619 conditions on the formation of extracellular matrix in cartilage tissue-engineering  
620 constructs. *Bulletin of experimental biology and medicine* **156**, 548-555,  
621 doi:10.1007/s10517-014-2394-3 (2014).
- 622 24 Weber, M.-C. *et al.* In vitro and in silico modeling of cellular and matrix-related changes  
623 during the early phase of osteoarthritis. *bioRxiv*, 725317, doi:10.1101/725317 (2019).
- 624 25 Frith, J. E., Thomson, B. & Genever, P. G. Dynamic three-dimensional culture methods  
625 enhance mesenchymal stem cell properties and increase therapeutic potential. *Tissue*  
626 *Eng Part C Methods* **16**, 735-749, doi:10.1089/ten.TEC.2009.0432 (2010).
- 627 26 Kabiri, M. *et al.* 3D mesenchymal stem/stromal cell osteogenesis and autocrine  
628 signalling. *Biochem Biophys Res Commun* **419**, 142-147,  
629 doi:10.1016/j.bbrc.2012.01.017 (2012).
- 630 27 Standal, T., Borset, M. & Sundan, A. Role of osteopontin in adhesion, migration, cell  
631 survival and bone remodeling. *Exp. Oncol.* **26**, 179-184 (2004).
- 632 28 Muraglia, A. *et al.* Formation of a chondro-osseous rudiment in micromass cultures of  
633 human bone-marrow stromal cells. *J Cell Sci* **116**, 2949-2955, doi:10.1242/jcs.00527  
634 (2003).
- 635 29 Hoshiba, T., Kawazoe, N., Tateishi, T. & Chen, G. Development of stepwise  
636 osteogenesis-mimicking matrices for the regulation of mesenchymal stem cell  
637 functions. *J Biol Chem* **284**, 31164-31173, doi:10.1074/jbc.M109.054676 (2009).
- 638 30 Xu, J., Li, Z., Hou, Y. & Fang, W. Potential mechanisms underlying the Runx2 induced  
639 osteogenesis of bone marrow mesenchymal stem cells. *Am J Transl Res* **7**, 2527-2535  
640 (2015).
- 641 31 Gerber, H. P. *et al.* VEGF couples hypertrophic cartilage remodeling, ossification and  
642 angiogenesis during endochondral bone formation. *Nat. Med.* **5**, 623-628 (1999).
- 643 32 Zhang, Y., Madhu, V., Dighe, A. S., Irvine, J. N., Jr. & Cui, Q. Osteogenic response of  
644 human adipose-derived stem cells to BMP-6, VEGF, and combined VEGF plus BMP-

- 645 6 in vitro. *Growth factors (Chur, Switzerland)* **30**, 333-343,  
646 doi:10.3109/08977194.2012.720574 (2012).
- 647 33 Chae, K. S. *et al.* Opposite functions of HIF- $\alpha$  isoforms in VEGF induction by TGF- $\beta$ 1  
648 under non-hypoxic conditions. *Oncogene* **30**, 1213-1228, doi:10.1038/onc.2010.498  
649 (2011).
- 650 34 Chung, I. H., Han, J., Iwata, J. & Chai, Y. Msx1 and Dlx5 function synergistically to  
651 regulate frontal bone development. *Genesis (New York, N.Y. : 2000)* **48**, 645-655,  
652 doi:10.1002/dvg.20671 (2010).
- 653 35 Nakashima, T. *et al.* Evidence for osteocyte regulation of bone homeostasis through  
654 RANKL expression. *Nat Med* **17**, 1231-1234, doi:10.1038/nm.2452 (2011).
- 655 36 Pfeifferberger, M. *et al.* Hypoxia and mesenchymal stromal cells as key drivers of initial  
656 fracture healing in an equine in vitro fracture hematoma model. *PLOS ONE* **14**,  
657 e0214276, doi:10.1371/journal.pone.0214276 (2019).
- 658 37 Hoff, P. *et al.* Human immune cells' behavior and survival under bioenergetically  
659 restricted conditions in an in vitro fracture hematoma model. *Cellular & Molecular*  
660 *Immunology* **10**, 151-158, doi:10.1038/cmi.2012.56 (2013).
- 661 38 Scutera, S. *et al.* Adaptive Regulation of Osteopontin Production by Dendritic Cells  
662 Through the Bidirectional Interaction With Mesenchymal Stromal Cells. *Front Immunol*  
663 **9**, 1207, doi:10.3389/fimmu.2018.01207 (2018).
- 664 39 Schell, H. *et al.* The haematoma and its role in bone healing. *Journal of experimental*  
665 *orthopaedics* **4**, 5, doi:10.1186/s40634-017-0079-3 (2017).
- 666 40 El Khassawna, T. *et al.* T Lymphocytes Influence the Mineralization Process of Bone.  
667 *Front Immunol* **8**, 562-562, doi:10.3389/fimmu.2017.00562 (2017).
- 668 41 Reinke, S. *et al.* Terminally differentiated CD8(+) T cells negatively affect bone  
669 regeneration in humans. *Science translational medicine* **5**, 177ra136,  
670 doi:10.1126/scitranslmed.3004754 (2013).
- 671 42 Grassi, F. *et al.* T cell subsets differently regulate osteogenic differentiation of human  
672 mesenchymal stromal cells in vitro. *J Tissue Eng Regen Med* **10**, 305-314,  
673 doi:10.1002/term.1727 (2016).
- 674 43 Qu, Z. H., Zhang, X. L., Tang, T. T. & Dai, K. R. Promotion of osteogenesis through  
675 beta-catenin signaling by desferrioxamine. *Biochem Biophys Res Commun* **370**, 332-  
676 337, doi:10.1016/j.bbrc.2008.03.092 (2008).
- 677 44 Kashte, S., Jaiswal, A. K. & Kadam, S. Artificial Bone via Bone Tissue Engineering:  
678 Current Scenario and Challenges. *Tissue Engineering and Regenerative Medicine* **14**,  
679 1-14, doi:10.1007/s13770-016-0001-6 (2017).
- 680 45 Gaber, T. *et al.* Impact of Janus Kinase Inhibition with Tofacitinib on Fundamental  
681 Processes of Bone Healing. *International journal of molecular sciences* **21**,  
682 doi:10.3390/ijms21030865 (2020).
- 683 46 Ponomarev, I. & Wilke, I. Manufacturing process of three dimensional tissue structures  
684 and structures obtainable thereby. (2004).
- 685 47 Hahn, M., Vogel, M., Pompesius-Kempa, M. & Delling, G. Trabecular bone pattern  
686 factor—a new parameter for simple quantification of bone microarchitecture. *Bone* **13**,  
687 327-330, doi:[https://doi.org/10.1016/8756-3282\(92\)90078-B](https://doi.org/10.1016/8756-3282(92)90078-B) (1992).
- 688 48 Kawamoto, T. & Kawamoto, K. Preparation of thin frozen sections from nonfixed and  
689 undecalcified hard tissues using Kawamoto's film method (2012). *Methods in molecular*  
690 *biology (Clifton, N.J.)* **1130**, 149-164, doi:10.1007/978-1-62703-989-5\_11 (2014).
- 691

692 **Supplementary Information**

693 **Table S1:** Results from Wilcoxon signed rank test for Figure 3c-e

| Specification | Wilcoxon signed rank test                  |                |
|---------------|--------------------------------------------|----------------|
|               | Hypothetical median = 1<br><i>p</i> -value | 95% CI         |
| <i>RUNX2</i>  | 0.7344                                     | -0.50 – 68.05  |
| <i>SPP1</i>   | <b>0.0039**</b>                            | 0.82 – 27.34   |
| <i>DLX5</i>   | 0.1563                                     | -0.54 – 19.25  |
| <i>SOX9</i>   | 0.7422                                     | -0.99 - 10.51  |
| <i>RANKL</i>  | <b>0.0391*</b>                             | -0.99 – 351.10 |
| <i>VEGF</i>   | <b>0.002**</b>                             | 0.17 – 25.72   |
| <i>PGK1</i>   | 0.2754                                     | -0.45 – 2.22   |
| <i>LDHA</i>   | <b>0.0195*</b>                             | -0.66 – 0.20   |
| <i>HIF</i>    | 0.5566                                     | -0.76 – 2.18   |
| <i>EPAS</i>   | 0.7695                                     | -0.82 – 0.03   |

694

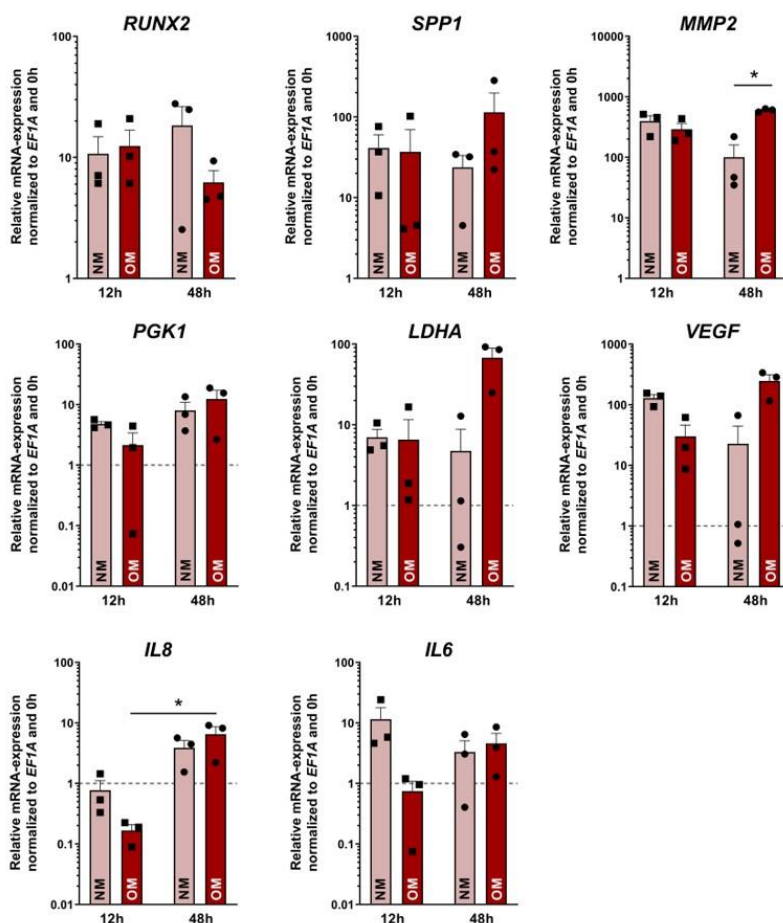

695

696 **Figure S1: Co-cultivation of SFBCs and *in vitro* fracture hematomas.** qPCR results of the fracture hematoma  
 697 model or the after 12 and 48h co-cultivation under hypoxic conditions. Data are normalized to *EF1A* and 0h and  
 698 presented as mean ± SEM (n = 3). Statistical significance was determined using the Kruskal Wallis test with Dunn's  
 699 multiple comparisons test and Wilcoxon signed rank test (Table S2 - S5). \**p*<0.05.



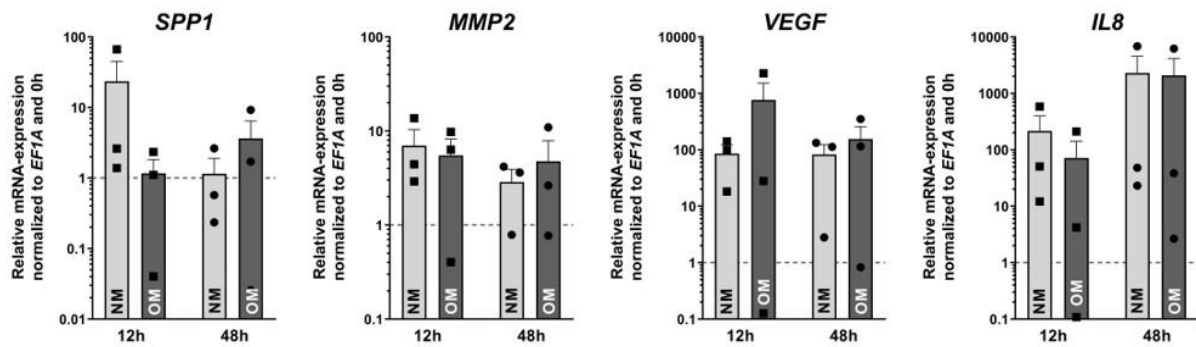

700  
701  
702  
703  
704  
705

**Figure S2: Co-cultivation of SFBCs and *in vitro* fracture hematomas** qPCR results of the SFBCs after 12 and 48h co-cultivation under hypoxic conditions. Data are normalized to *EF1A* and 0h and presented as mean ± SEM (n= 3). Statistical significance was determined using the Kruskal Wallis test with Dunn's multiple comparisons test and Wilcoxon signed rank test (Table S2 - S5). \**p*<0.05.

706 **Table S2:** Results from Wilcoxon signed rank test for Figure 4c,d

| Specification<br>including 0h | Wilcoxon signed rank test |  |
|-------------------------------|---------------------------|--|
|                               | hypothetical median = 1   |  |
|                               | <b><i>p</i>-value</b>     |  |
| 48h NM - RUNX2                | 0.25                      |  |
| 48h OM - RUNX2                | 0.25                      |  |
| 48h NM - SPP1                 | 0.25                      |  |
| 48h OM - SPP1                 | 0.25                      |  |
| 48h NM - MMP2                 | 0.25                      |  |
| 48h OM - MMP2                 | 0.25                      |  |
| 48h NM - PGK1                 | 0.25                      |  |
| 48h OM - PGK1                 | 0.50                      |  |
| 48h NM - LDHA                 | 0.50                      |  |
| 48h OM - LDHA                 | 0.25                      |  |
| 48h NM - VEGF                 | >0.99                     |  |
| 48h OM - VEGF                 | 0.25                      |  |
| 48h NM - IL8                  | 0.50                      |  |
| 48h OM - IL8                  | 0.25                      |  |
| 48h NM - IL6                  | 0.50                      |  |
| 48h OM - IL6                  | 0.25                      |  |

707  
708  
709  
710

711 **Table S3:** Results from Wilcoxon signed rank test for Figure 4c,d

| Specification<br>including 0h | Wilcoxon matched-pairs<br>signed rank test<br><i>p</i> -value |
|-------------------------------|---------------------------------------------------------------|
| <i>NM vs. OM - RUNX2</i>      | <i>0.50</i>                                                   |
| <i>NM vs. OM - SPP1</i>       | <i>0.50</i>                                                   |
| <i>NM vs. OM - MMP2</i>       | <i>0.25</i>                                                   |
| <i>NM vs. OM - PGK1</i>       | <i>0.50</i>                                                   |
| <i>NM vs. OM - LDHA</i>       | <i>0.25</i>                                                   |
| <i>NM vs. OM - VEGF</i>       | <i>0.25</i>                                                   |
| <i>NM vs. OM - IL8</i>        | <i>0.50</i>                                                   |
| <i>NM vs. OM - IL6</i>        | <i>0.75</i>                                                   |

712

713 **Table S4:** Results from Kruskal Wallis test with Dunn's multiple comparisons test for Figure 5

| Specification | Kruskal-Wallis test |                 | Adjusted <i>p</i> -value<br>if applicable |
|---------------|---------------------|-----------------|-------------------------------------------|
|               | H                   | <i>p</i> -value |                                           |
| IL-6          | <i>1.77</i>         | <i>0.67</i>     | -                                         |
| IL-8          | <i>1.97</i>         | <i>0.63</i>     | -                                         |
| GM-CSF        | <i>4.74</i>         | <i>0.21</i>     | -                                         |
| MIP           | <i>0.64</i>         | <i>0.92</i>     | -                                         |

714

715 **Table S5:** Results from Wilcoxon signed rank test for Figure 6a

| Specification<br>including 0h | Wilcoxon signed rank test<br>hypothetical median = 1<br><i>p</i> -value |
|-------------------------------|-------------------------------------------------------------------------|
| <i>RUNX2</i>                  | <i>&gt;0.99</i>                                                         |
| <i>SPP1</i>                   | <i>0.25</i>                                                             |
| <i>MMP2</i>                   | <i>0.50</i>                                                             |
| <i>PGK1</i>                   | <i>0.75</i>                                                             |
| <i>LDHA</i>                   | <i>0.50</i>                                                             |
| <i>VEGF</i>                   | <i>0.50</i>                                                             |
| <i>IL8</i>                    | <i>&gt;0.99</i>                                                         |
| <i>IL6</i>                    | <i>0.50</i>                                                             |

716

717

718 **Table S6:** Results from Wilcoxon signed rank test for Figure 6b

| Specification<br>including 0h | Wilcoxon signed rank test<br>hypothetical median = 1 |  |
|-------------------------------|------------------------------------------------------|--|
|                               | <b>p-value</b>                                       |  |
| <i>SPP1</i>                   | 0.75                                                 |  |
| <i>MMP2</i>                   | 0.50                                                 |  |
| <i>VEGF</i>                   | 0.50                                                 |  |
| <i>IL8</i>                    | 0.75                                                 |  |

719 **Table S7:** Results from Wilcoxon signed rank test for Figure 6c

| Specification<br>including 0h | Wilcoxon signed rank test<br>hypothetical median = 1 |  |
|-------------------------------|------------------------------------------------------|--|
|                               | <b>p-value</b>                                       |  |
| <i>RUNX2</i>                  | 0.50                                                 |  |
| <i>SPP1</i>                   | 0.50                                                 |  |
| <i>MMP2</i>                   | 0.25                                                 |  |
| <i>PGK1</i>                   | 0.75                                                 |  |
| <i>LDHA</i>                   | >0.99                                                |  |
| <i>VEGF</i>                   | 0.75                                                 |  |
| <i>IL8</i>                    | 0.25                                                 |  |
| <i>IL6</i>                    | 0.25                                                 |  |

720 **Table S8:** Results from Wilcoxon signed rank test for Figure 6d

| Specification<br>including 0h | Wilcoxon signed rank test<br>hypothetical median = 1 |  |
|-------------------------------|------------------------------------------------------|--|
|                               | <b>p-value</b>                                       |  |
| <i>SPP1</i>                   | 0.25                                                 |  |
| <i>MMP2</i>                   | >0.99                                                |  |
| <i>VEGF</i>                   | 0.75                                                 |  |
| <i>IL8</i>                    | >0.99                                                |  |

721 **Table S9:** Results from Kruskal Wallis test with Dunn's multiple comparisons test for Figure 6c

| Specification | Kruskal-Wallis test |         | Adjusted p-value<br>if applicable |
|---------------|---------------------|---------|-----------------------------------|
|               | H                   | p-value |                                   |
| IL-6          | 1.15                | 0.81    | -                                 |
| IL-8          | 2.54                | 0.52    | -                                 |
| GM-CSF        | 2.69                | 0.49    | -                                 |
| MIP           | 1.68                | 0.68    | -                                 |

722

723

724 **Table S10:** Sequences of primers used for qPCR.

|              | <b>Gene</b>                                        | <b>Sequence of forward primer</b> | <b>Sequence of reverse primer</b> |
|--------------|----------------------------------------------------|-----------------------------------|-----------------------------------|
| <b>SPP1</b>  | <i>Secreted phosphoprotein 1</i>                   | GCCGAGGTGATAGTGTGGTT              | TGAGGTGATGTCCTCGTCGTCTG           |
| <b>VEGFA</b> | <i>Vascular endothelial growth factor A</i>        | AGCCTTGCCTTGCTGCTCTA              | GTGCTGGCCTTGGTGAGG                |
| <b>DLX5</b>  | <i>Distal-Less Homeobox 5</i>                      | GCTGGGATTGACACAAACAC              | AGGCACCATTGAAAGTGTCC              |
| <b>RUNX2</b> | <i>Runt-related transcription factor 2</i>         | TTACTTACACCCCGCCAGTC              | TATGGAGTGCTGCTGGTCTG              |
| <b>EF1A</b>  | <i>Elongation factor 1-alpha</i>                   | GTTGATATGGTTCCTGGCAAGC            | TTGCCAGCTCCAGCAGCCT               |
| <b>MMP2</b>  | <i>Matrix metalloproteinase-2</i>                  | GATACCCCTTTGACGGTAAGGA            | CCTTCTCCCAAGGTCCATAGC             |
| <b>IL8</b>   | <i>Interleukin 8</i>                               | GGACCCCAAGGAAAACCTGG              | CAACCCTACAACAGACCCACAC            |
| <b>IL6</b>   | <i>Interleukin 6</i>                               | TACCCCCAGGAGAAGATTCC              | TTTTCTGCCAGTGCCTCTTT              |
| <b>RANKL</b> | <i>Receptor Activator of NF-κB Ligand</i>          | CTCAGCCTTTTGCTCATCTCACT           | CCAAGAGGACAGACTCACTTTATGG         |
| <b>SPI1</b>  | <i>Transcription factor PU.1</i>                   | GTGCCCTATGACACGGATCTA             | AGTCCCAGTAATGGTCGCTAT             |
| <b>SOX9</b>  | <i>SRY (sex determining region Y)-box 9</i>        | CGCCTTGAAGATGGCGTTG               | GCTCTGGAGACTTCTGAACGA             |
| <b>PGK1</b>  | <i>Phosphoglycerate kinase 1</i>                   | ATGGATGAGGTGGTGAAAGC              | CAGTGCTCACATGGCTGACT              |
| <b>LDHA</b>  | <i>Lactate dehydrogenase A</i>                     | ACCCAGTTTCCACCATGATT              | CCCAAAATGCAAGGAACACT              |
| <b>HIF1A</b> | <i>Hypoxia-inducible factor 1-alpha</i>            | CCATTAGAAAGCAGTTCCGC              | TGGGTAGGAGATGGAGATGC              |
| <b>EPAS</b>  | <i>Endothelial PAS domain-containing protein 1</i> | TCGGCTTTTTGCCATCTGTG              | TGTCCAAATGTGCCGTGTGA              |

725

726
